# Supplementary material for: Reducing early career general practitioners’ antibiotic prescribing for respiratory tract infections: a pragmatic prospective non-randomised controlled trial
Source: Oxford University Press journal article supplement (doi:10.1093/fampra/cmx070), 2017-06-30
Supplement: cmx070_suppl_supplementary-table-1.docx [file cmx070_suppl_supplementary-table-1.docx]

**Supplementary Table 1: Odds ratios (95% Confidence intervals) and p-values from the interaction term in the logistic regression model for acute bronchitis/bronchiolitis when the analyses are restricted by round of data collection in the ReCEnT study**

| **Rounds included in the analysis** | **Odds ratios (95% Confidence Intervals); p-value** |
| --- | --- |
| 6-11 | 0.46 (0.23 to 0.90); 0.024 |
| 7-11 | 0.46 (0.23 to 0.92); 0.028 |
| 8-11 | 0.46 (0.23 to 0.94); 0.033 |
| 9-11 | 0.41 (0.20 to 0.86); 0.018 |
| 10-11 | 0.45 (0.19 to 1.07); 0.070 |
